# Supplementary material for: Identifying density-dependent interactions in collective cell behaviour
Source: bioRxiv or medRxiv preprint supplement (doi:10.1101/811257), 2020-02-27
Supplement: Supplementary file [file media-1.pdf]

# Supplementary Material for “Identifying density-dependent interactions in collective cell behaviour”

Alexander P Browning<sup>1,2\*</sup>, Wang Jin<sup>1</sup>, Michael J Plank<sup>3,4</sup>, and Matthew J Simpson<sup>1</sup>

<sup>1</sup>*School of Mathematical Sciences, Queensland University of Technology, Brisbane, Australia*

<sup>2</sup>*ARC Centre of Excellence for Mathematical and Statistical Frontiers, QUT, Australia*

<sup>3</sup>*Biomathematics Research Centre, University of Canterbury, Christchurch, New Zealand*

<sup>4</sup>*Te Pūnaha Matatini, a New Zealand Centre of Research Excellence, New Zealand*

October 18, 2019

## Contents

|     |                                                         |    |
|-----|---------------------------------------------------------|----|
| 1   | ABC algorithms . . . . .                                | 2  |
| 1.1 | ABC rejection algorithm . . . . .                       | 2  |
| 1.2 | SMC algorithm . . . . .                                 | 3  |
| 2   | Pilot ABC results . . . . .                             | 4  |
| 2.1 | Pilot ABC to determine $\sigma$ . . . . .               | 4  |
| 2.2 | Wider priors . . . . .                                  | 5  |
| 2.3 | Excluding $\mathcal{P}$ from inference . . . . .        | 6  |
| 3   | Quantile plots . . . . .                                | 7  |
| 4   | Considering $\gamma_p = 0$ . . . . .                    | 8  |
| 5   | Model selection for $\sigma = 24 \mu\text{m}$ . . . . . | 9  |
| 6   | Results for all nine experiments . . . . .              | 9  |
| 6.1 | Full results for $\sigma = 12 \mu\text{m}$ . . . . .    | 10 |
| 6.2 | Full results for $\sigma = 24 \mu\text{m}$ . . . . .    | 12 |

## List of Figures

|     |                                                                                       |    |
|-----|---------------------------------------------------------------------------------------|----|
| S1  | Posteriors where $\sigma$ is sampled from $U(2,30)$ . . . . .                         | 4  |
| S2  | Fig S1 with wider priors for $\gamma_p$ and $\gamma_b$ . . . . .                      | 5  |
| S3  | Fig S1 where $w_{\mathcal{P}} = 0$ . . . . .                                          | 6  |
| S4  | Quantile plot . . . . .                                                               | 7  |
| S5  | Fig 4 where we allow $\gamma_p = 0$ . . . . .                                         | 8  |
| S6  | Posteriors for $\sigma = 24 \mu\text{m}$ . . . . .                                    | 9  |
| S7  | Fig 6 for all replicates, cell locations . . . . .                                    | 10 |
| S8  | Fig 6 for all replicates, summary statistics . . . . .                                | 11 |
| S9  | Fig 6 for all replicates and $\sigma = 24 \mu\text{m}$ , cell locations . . . . .     | 12 |
| S10 | Fig 6 for all replicates and $\sigma = 24 \mu\text{m}$ , summary statistics . . . . . | 13 |

---

\*Corresponding author. E-mail: ap.browning@qut.edu.au

# 1 ABC algorithms

Here, we present the ABC rejection algorithm (algorithm 1) and ABC SMC algorithm (algorithm 2).

## 1.1 ABC rejection algorithm

---

**Algorithm 1** ABC rejection sampling algorithm.

---

- 1: Draw parameter samples from the joint prior  $\theta_j \sim \pi(\theta)$ .
  - 2: Set discrepancy of  $j$ th sample  $\kappa_j = 0$ , experiment index  $i = 1$ .
    - 2.1: Set agent locations,  $\{\mathbf{x}_n\}_{n=1}^{N(0)}$ , to match experimental data  $\mathbf{X}_{\text{obs}}^{(i)}$  at  $t = 0$ .
    - 2.2: Simulate model with parameters  $\theta_j$  for  $t \leq 36$ , storing the agent locations at  $t = 18$  h and  $t = 36$  h, denoted  $\mathbf{X}_{\text{sim}}^{(i)}$ .
    - 2.3: Update the discrepancy  $\kappa_j \leftarrow \kappa_j + d(\mathbf{X}_{\text{obs}}^{(i)}, \mathbf{X}_{\text{sim}}^{(i)})$ , where  $d(\cdot, \cdot)$  is the discrepancy function.
    - 2.4: Move to the next replicate by setting  $i = i + 1$  and repeat steps 2.1–2.4 until  $i = 9$ .
  - 3: Repeat steps 1–2 until  $10^5$  samples  $\{\theta_j, \varepsilon_j\}_{j=1}^{10^5}$  are simulated.
  - 4: Order  $\{\theta_j, \kappa_j\}_{j=1}^{10^5}$  by  $\kappa_j$  such that  $\kappa_j < \kappa_{j+1}$ .
  - 5: Retain the first 1% ( $\alpha = 0.01$ ) of prior samples  $\theta_j$ , as posterior samples,  $\{\theta_j\}_{j=1}^{10^5\alpha}$ .
-

## 1.2 SMC algorithm

We apply the SMC model selection algorithm of Toni *et al.* [1], given in algorithm 2. We choose the perturbation kernel to be a multivariate Gaussian with independent components and variances approximately equal to the ABC rejection posterior variances [2].

---

**Algorithm 2** ABC SMC sampling algorithm for model selection with uniform priors [1].

---

- 1: Choose  $\varepsilon_1, \dots, \varepsilon_T$  such that  $\varepsilon_k > \varepsilon_{k+1}$  and the desired total number of particles,  $N_{\text{samples}}$ . Set the population indicator  $k = 1$ .
- 2: Set the particle indicator  $j = 1$ .
  - 2.1: Sample model indicator,  $M_a^* \sim \pi(M_a)$ .
  - 2.2: If  $k = 1$ , sample proposal  $\theta^{**} \sim \pi_a(\theta)$  where  $\pi_a(\theta)$  is the prior given model  $M_a^*$ . Go to step 2.4.
  - 2.3: If  $k > 1$ , sample  $\theta^*$  from the subset of the previous population of particles for  $M_a$ ,  $\Theta^{(a)}(k-1)$ . If population is empty, return to 2.1. Perturb  $\theta^{**} \sim K(\theta|\theta^*)$ , where  $K(\cdot, \cdot)$  is a symmetric perturbation kernel. If  $\pi_a(\theta^{**}) = 0$ , return to step 2.1.
  - 2.4: Set discrepancy  $\kappa = 0$ , experiment index  $i = 1$ .
    - 2.4.1: Set agent locations,  $\{\mathbf{x}_n\}_{n=1}^{N(0)}$ , to match experimental data  $\mathbf{X}_{\text{obs}}^{(i)}$  at  $t = 0$ .
    - 2.4.2: Simulate model  $M_a$  with parameters  $\theta^{**}$  for  $t \leq 36$ , storing the agent locations at  $t = 18$  h and  $t = 36$  h, denoted  $\mathcal{X}_{\text{sim}}^{(i)}$ .
    - 2.4.3: Update the discrepancy  $\kappa = \kappa + d(\mathbf{X}_{\text{obs}}^{(i)}, \mathbf{X}_{\text{sim}}^{(i)})$ , where  $d(\cdot, \cdot)$  is the discrepancy function.
    - 2.4.4: If  $\kappa > \varepsilon_k$ , reject particle and go back to 2.1. Else, move to next replicate by setting  $i = i + 1$  and repeat steps 2.4.1–2.4.4 until  $i = 9$ .
- 2.5: Add  $\theta^{**}$  to the population of particles  $\Theta^{(a)}(k) = \{\theta_j(k)\}_{j=1}^{N_{\text{samples}}^{(a)}}$ , and calculate its weight as

$$w_j^{(a)}(k) = \begin{cases} 1, & k = 1, \\ \left( \sum_{j=1}^{N_{\text{samples}}^{(a)}} w_j^{(a)}(k-1) K(\theta^{**} | \theta_j(k-1)) \right)^{-1}, & k > 1. \end{cases}$$

- 2.6: Set  $j = j + 1$  and repeat steps 2.1–2.6 until  $j = N_{\text{samples}}$ .
  - 3: Set  $k = k + 1$  and normalise the weights within each model. Repeat step 2 until  $k = T$ .
-

## 2 Pilot ABC results

### 2.1 Pilot ABC to determine $\sigma$

In order to reduce the number of unknown parameters, we estimate and fix the kernel width parameter,  $\sigma$ . To do this, we perform a pilot ABC run where  $\pi(\sigma) = U(2, 30)$  using algorithm 1, the results of which are shown in figure S1. These results show a posterior mode of approximately  $\sigma \approx 12 \mu\text{m}$ , and we fix this for the rest of the study. In this supporting material document, we reproduce some results in the case that  $\sigma = 24 \mu\text{m}$ .

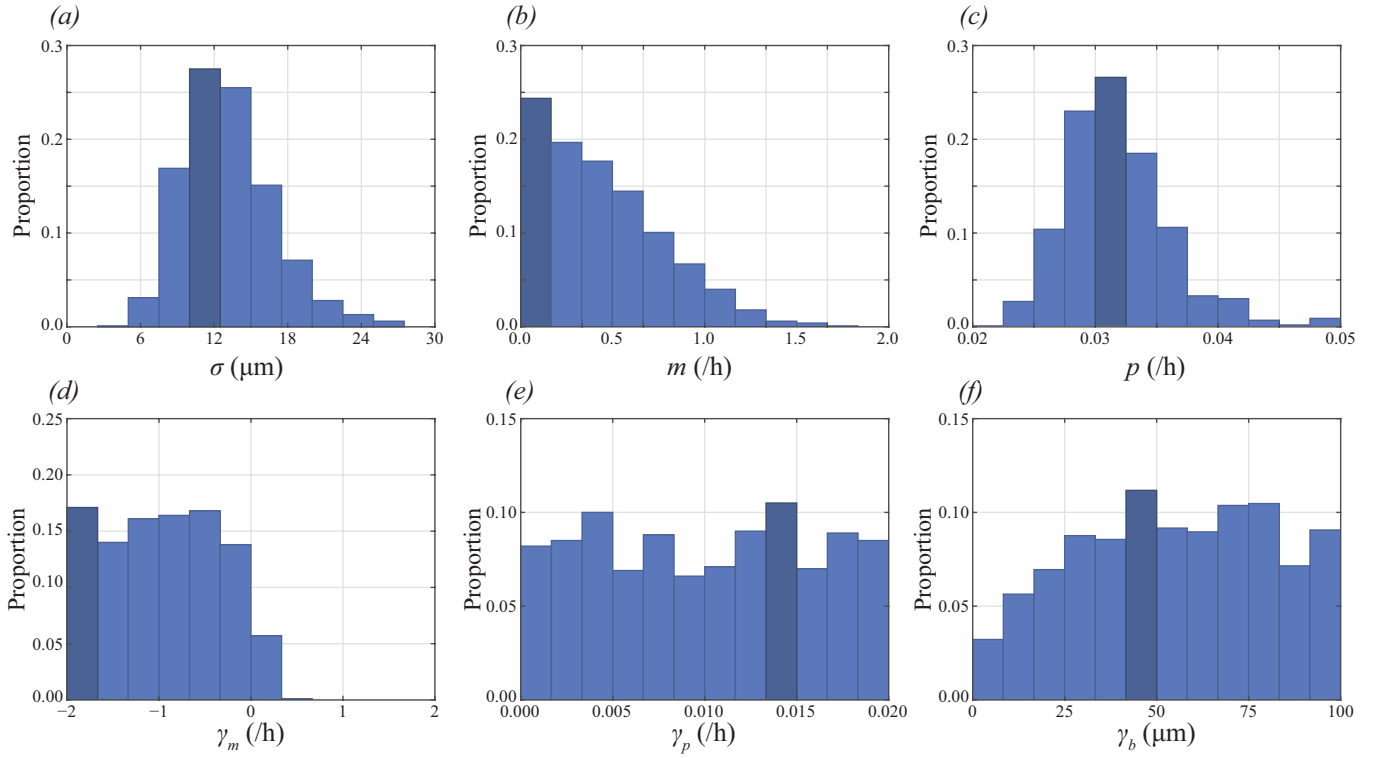

Figure S1: ABC rejection with  $\sigma$  as an unknown with  $\pi(\sigma) = U(2, 30)$ .

## 2.2 Wider priors

We notice in figure S1*ef* that the posterior support appears to cover the prior support. To investigate this, we widen the corresponding priors for  $\gamma_p$  and  $\gamma_b$  by a factor of two and perform ABC rejection. The results are shown in figure S2. These results suggest that  $\gamma_p$  and  $\gamma_b$  are non-identifiable.

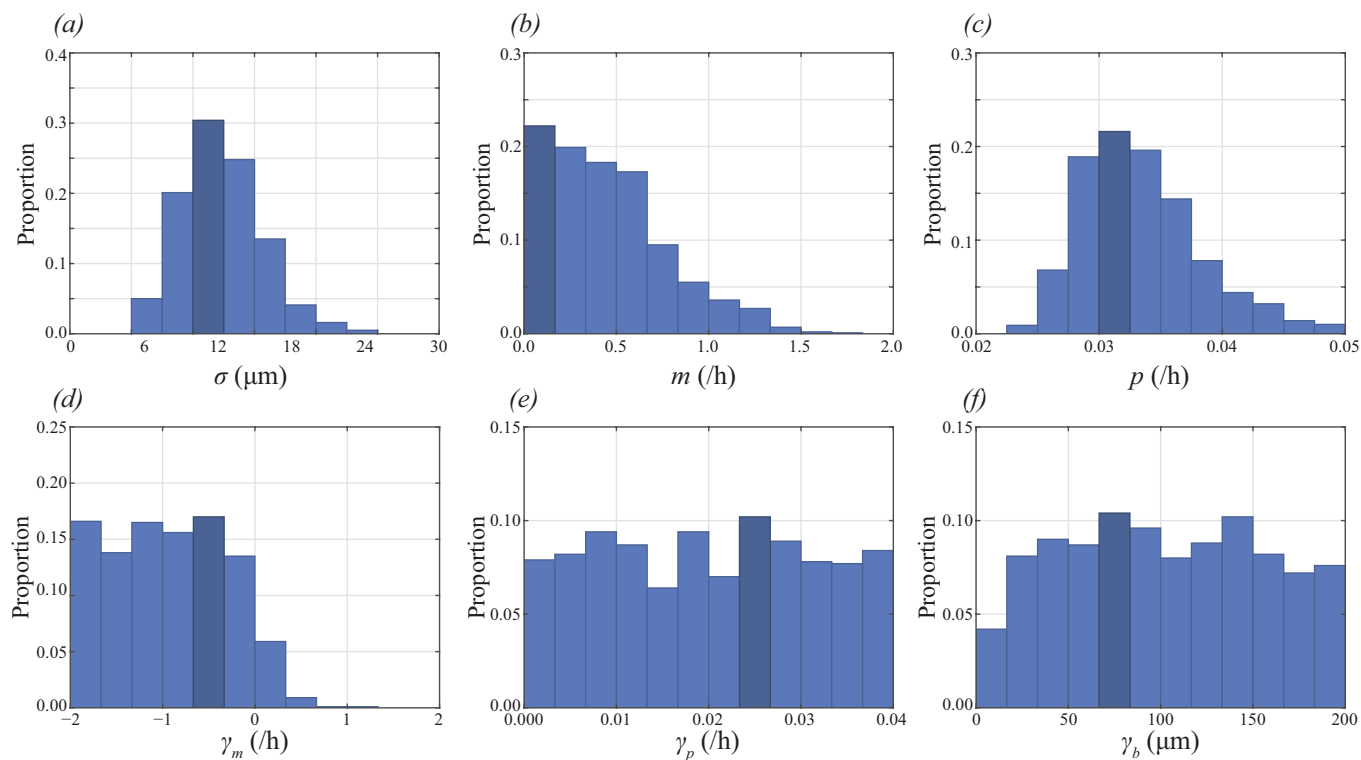

Figure S2: Figure S1 with wider priors for  $\gamma_p$  and  $\gamma_b$ .

### 2.3 Excluding $\mathcal{P}$ from inference

To investigate the amount of information contained in the pair correlation function,  $\mathcal{P}$ , we perform ABC rejection in the case  $\mathcal{P}$  is removed from the distance metric. The results are shown in figure S3. We see a large reduction in information in the posteriors in figure S3 compared to figure S1. In particular, the sign of  $\gamma_m$  is less clear in the case the pair correlation is excluded.

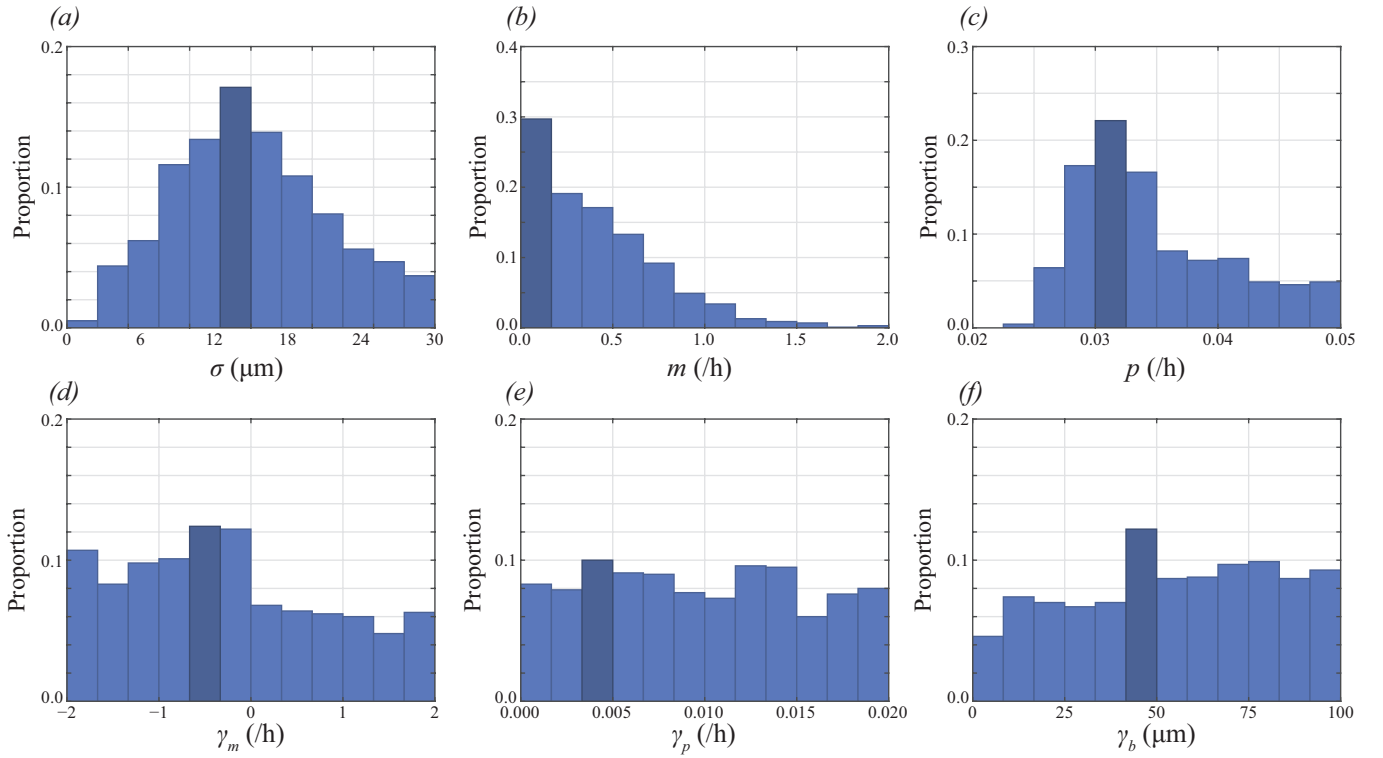

**Figure S3:** Figure S1 where summary statistics relating the the pair correlation,  $\mathcal{P}$  are excluded.

### 3 Quantile plots

To determine the appropriate ABC SMC sequence of thresholds, we produce a quantile plot of the distance metric obtained from 100,000 prior samples where  $\sigma = 12 \mu\text{m}$  (figure S4a) and  $\sigma = 24 \mu\text{m}$  (figure S4b). In each case, we choose the final discrepancy,  $\varepsilon_U$ , to correspond to an ABC rejection rate of approximately 1%. We choose the sequence base upon acceptance probabilities of approximately 50%, 25%, 12.5%, 6.25%, 3.125%, 1.5625% and 1% [2]. The sequence of thresholds for results in the main document where  $\sigma = 12 \mu\text{m}$  is {9.6, 7.3, 6.3, 5.5, 4.9, 4.6, 4.4}; and the sequence of thresholds for results in this supporting material document where  $\sigma = 24 \mu\text{m}$  is {11.8, 9.7, 8.4, 7.5, 6.8, 6.3, 6.0}.

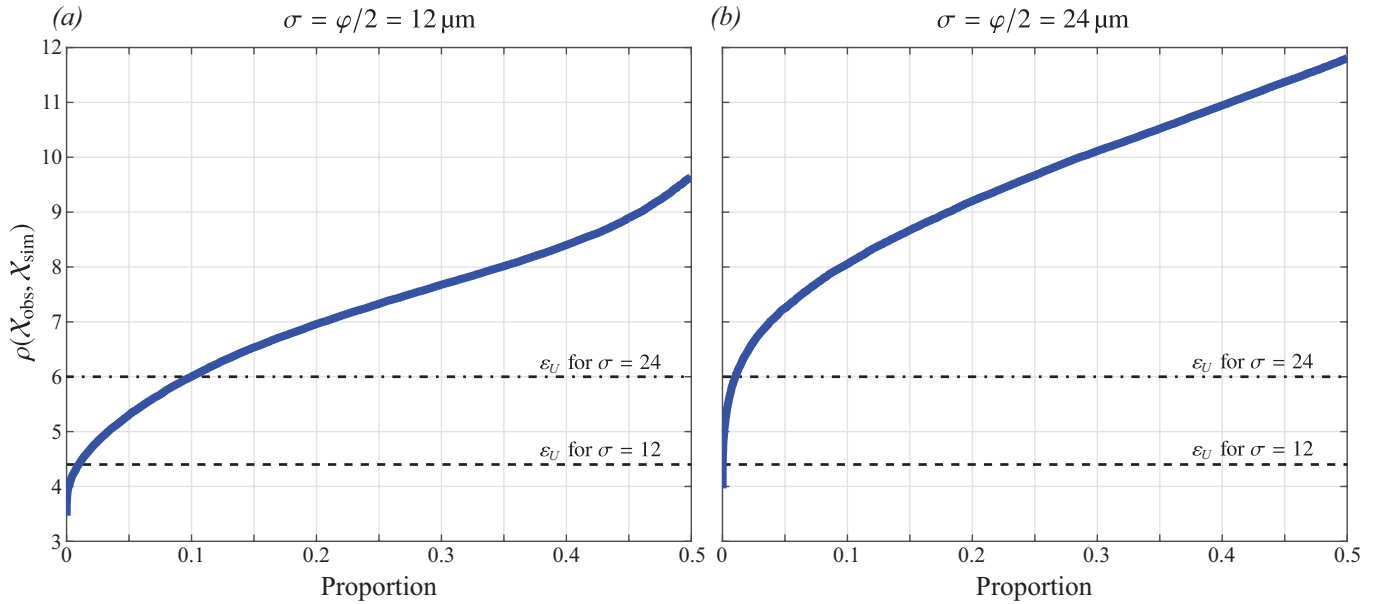

**Figure S4:** Quantile plot of the distance metric from 100,000 prior samples with (a)  $\sigma = 12 \mu\text{m}$ ; and, (b)  $\sigma = 12 \mu\text{m}$ . The final discrepancy,  $\varepsilon_U$ , is indicated by a horizontal line in each case.

## 4 Considering $\gamma_p = 0$

|         | $\theta_k$                             | Density Dependence                     |
|---------|----------------------------------------|----------------------------------------|
| Model 1 | $(m, p, \gamma_m, \gamma_p, \gamma_b)$ | Proliferation, Motility and Direction  |
| Model 2 | $(m, p, \gamma_p, \gamma_b)$           | Proliferation and Direction            |
| Model 3 | $(m, p, \gamma_m, \gamma_p)$           | Proliferation and Motility             |
| Model 4 | $(m, p, \gamma_p)$                     | Proliferation only (Fisher-Kolmogorov) |
| Model 5 | $(m, p)$                               | None (Skellam's model [3])             |
| Model 6 | $(m, p, \gamma_m, \gamma_b)$           | Motility and Direction                 |
| Model 7 | $(m, p, \gamma_b)$                     | Direction only                         |
| Model 8 | $(m, p, \gamma_m)$                     | Motility only                          |

**Table 1:** In the supporting material, we consider three additional models: Models 6, 7 and 8 correspond to Models 1, 2 and 3, where  $\gamma_p = 0$ .

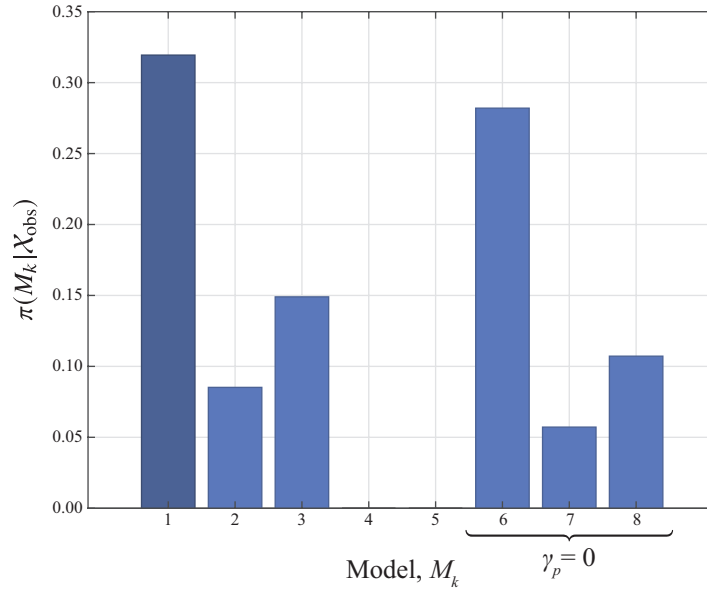

**Figure S5:** Figure 4 of the main document where we consider three additional models: Models 6, 7 and 8 correspond to Models 1, 2 and 3 where we set  $\gamma_p = 0$  to remove the proliferation interaction from the model.

|         | $\pi_{\varepsilon_T}(M_k   \mathcal{X}_{\text{obs}})$ | $\mathcal{B}_{k1}$ |
|---------|-------------------------------------------------------|--------------------|
| Model 1 | <b>0.3194</b>                                         | <b>1.000</b>       |
| Model 2 | 0.0852                                                | 0.2668             |
| Model 3 | 0.1490                                                | 0.4665             |
| Model 4 | 0.000                                                 | 0.000              |
| Model 5 | 0.000                                                 | 0.000              |
| Model 6 | 0.2820                                                | 0.8829             |
| Model 7 | 0.0572                                                | 0.1791             |
| Model 8 | 0.1072                                                | 0.3356             |

**Table 2:** In the supporting material, we consider three additional models: Models 6, 7 and 8 correspond to Models 1, 2 and 3, where  $\gamma_p = 0$ . The two other variables,  $m$  and  $p$ , are always unknown.



## 5 Model selection for $\sigma = 24 \mu\text{m}$

Here, we reproduce results from figure 5 of the main document, in the case we fix  $\sigma = 24 \mu\text{m}$ .

Results in figure S6a differ from those in the main document, in that Model 2 now has the highest posterior density. As such, we show the marginal distributions for each parameter in Model 2 in figure S6b–f. These results are consistent with the main document in showing that models without a density dependent motility mechanism (Models 4 and 5) are unable to simultaneously match data from all nine experiments. Examining results in figure S10 shows that  $\sigma = 24 \mu\text{m}$  is not able to match the spatial structure in the experimental data as closely as  $\sigma = 24 \mu\text{m}$ , results for which are shown in figure S8.

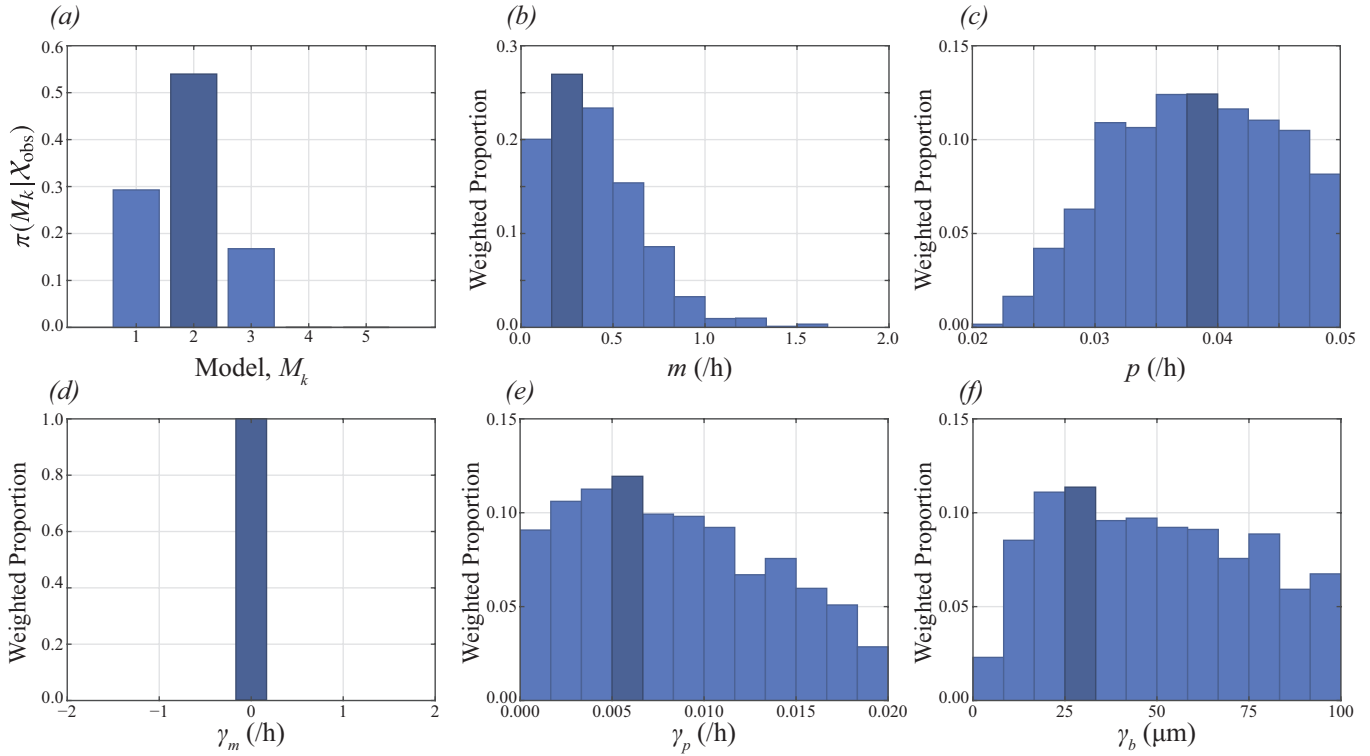

**Figure S6:** Reproduction of results in figure 6 of the main document, with  $\sigma = \varphi = 24 \mu\text{m}$ . (a) Posterior for the model index,  $\pi(M_k | \mathcal{X}_{\text{obs}})$ , showing that Model 2 (density-independent motility) as the posterior mode. (b)–(f) Marginal posterior distributions for each parameter in Model 2, shown as weighted histograms.

## 6 Results for all nine experiments

In the main document, we show results for experimental replicates 1, 3, 6 and 9 at  $t = 36$  h in figure 6. Here, we reproduce figure 6 and show results for all nine experimental replicates at both  $t = 18$  h and  $t = 36$  h.

In section 6.1 we show these results for  $\sigma = 12 \mu\text{m}$ , the value from the main document. In section 6.2 we show these results for  $\sigma = 24 \mu\text{m}$ .

## 6.1 Full results for $\sigma = 12 \mu\text{m}$

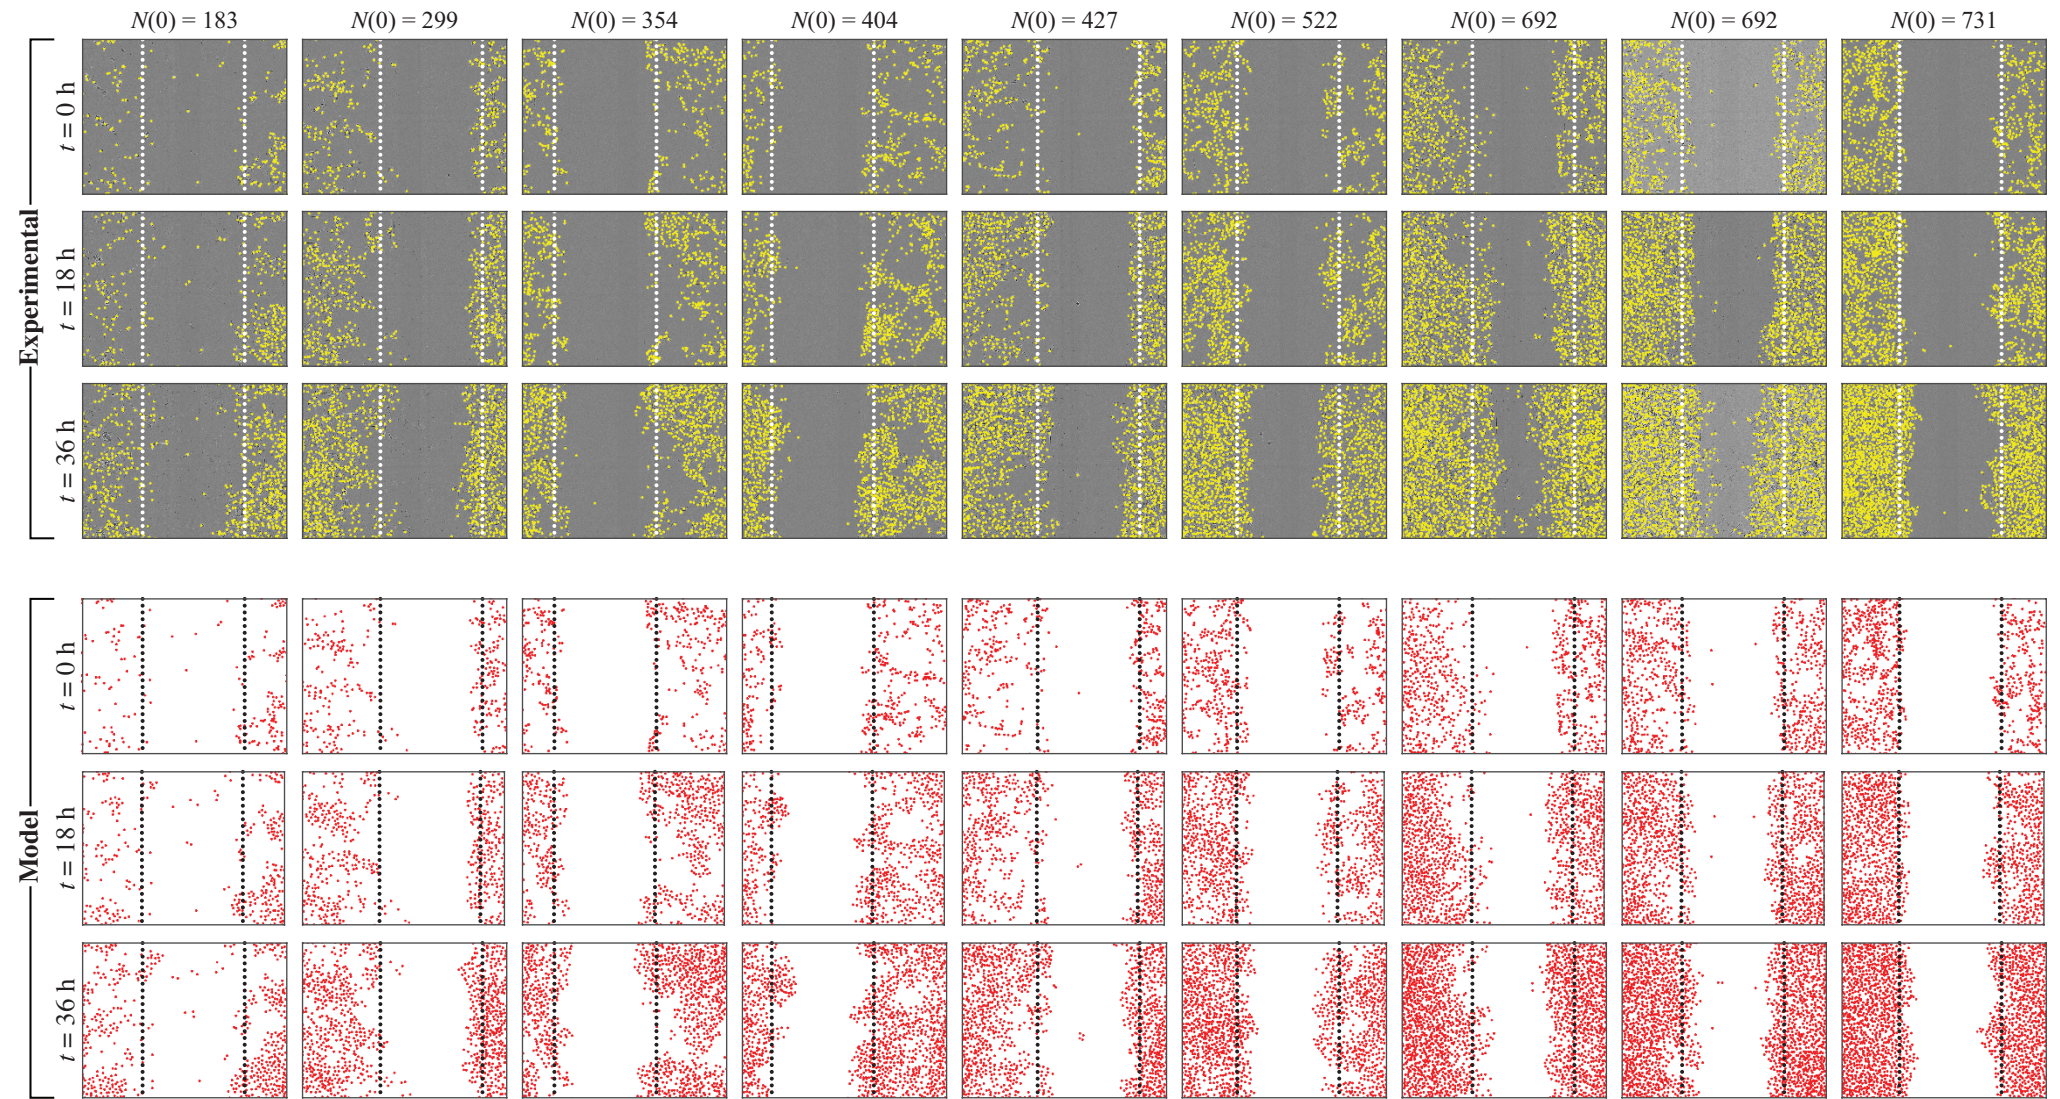

Figure S7: Reproduction of results in figure 6a-l of the main document, for all replicates, for  $\sigma = 12 \mu\text{m}$ .

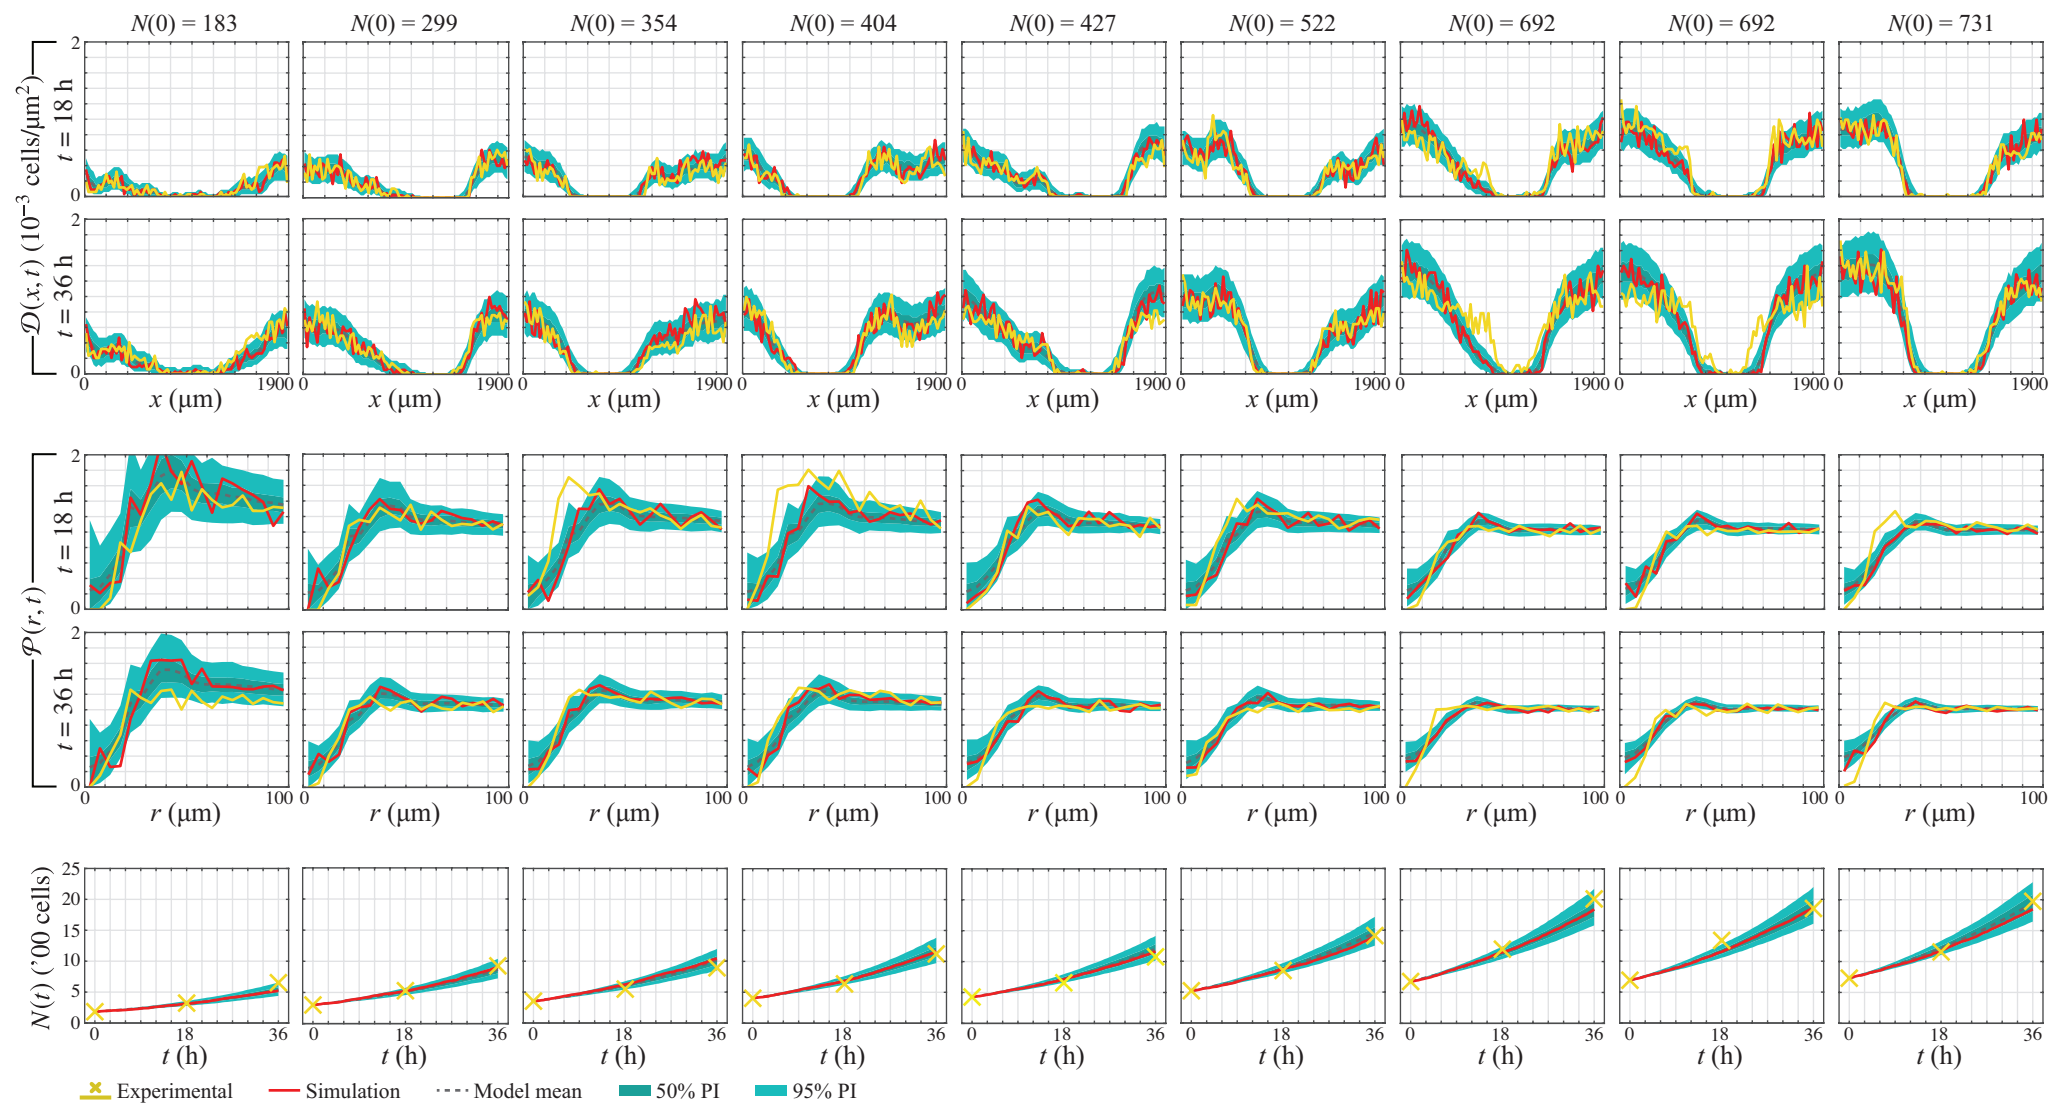

**Figure S8:** Reproduction of results in figure 6m-x of the main document, for all replicates, for  $\sigma = 12 \mu\text{m}$ .



## 6.2 Full results for $\sigma = 24 \mu\text{m}$

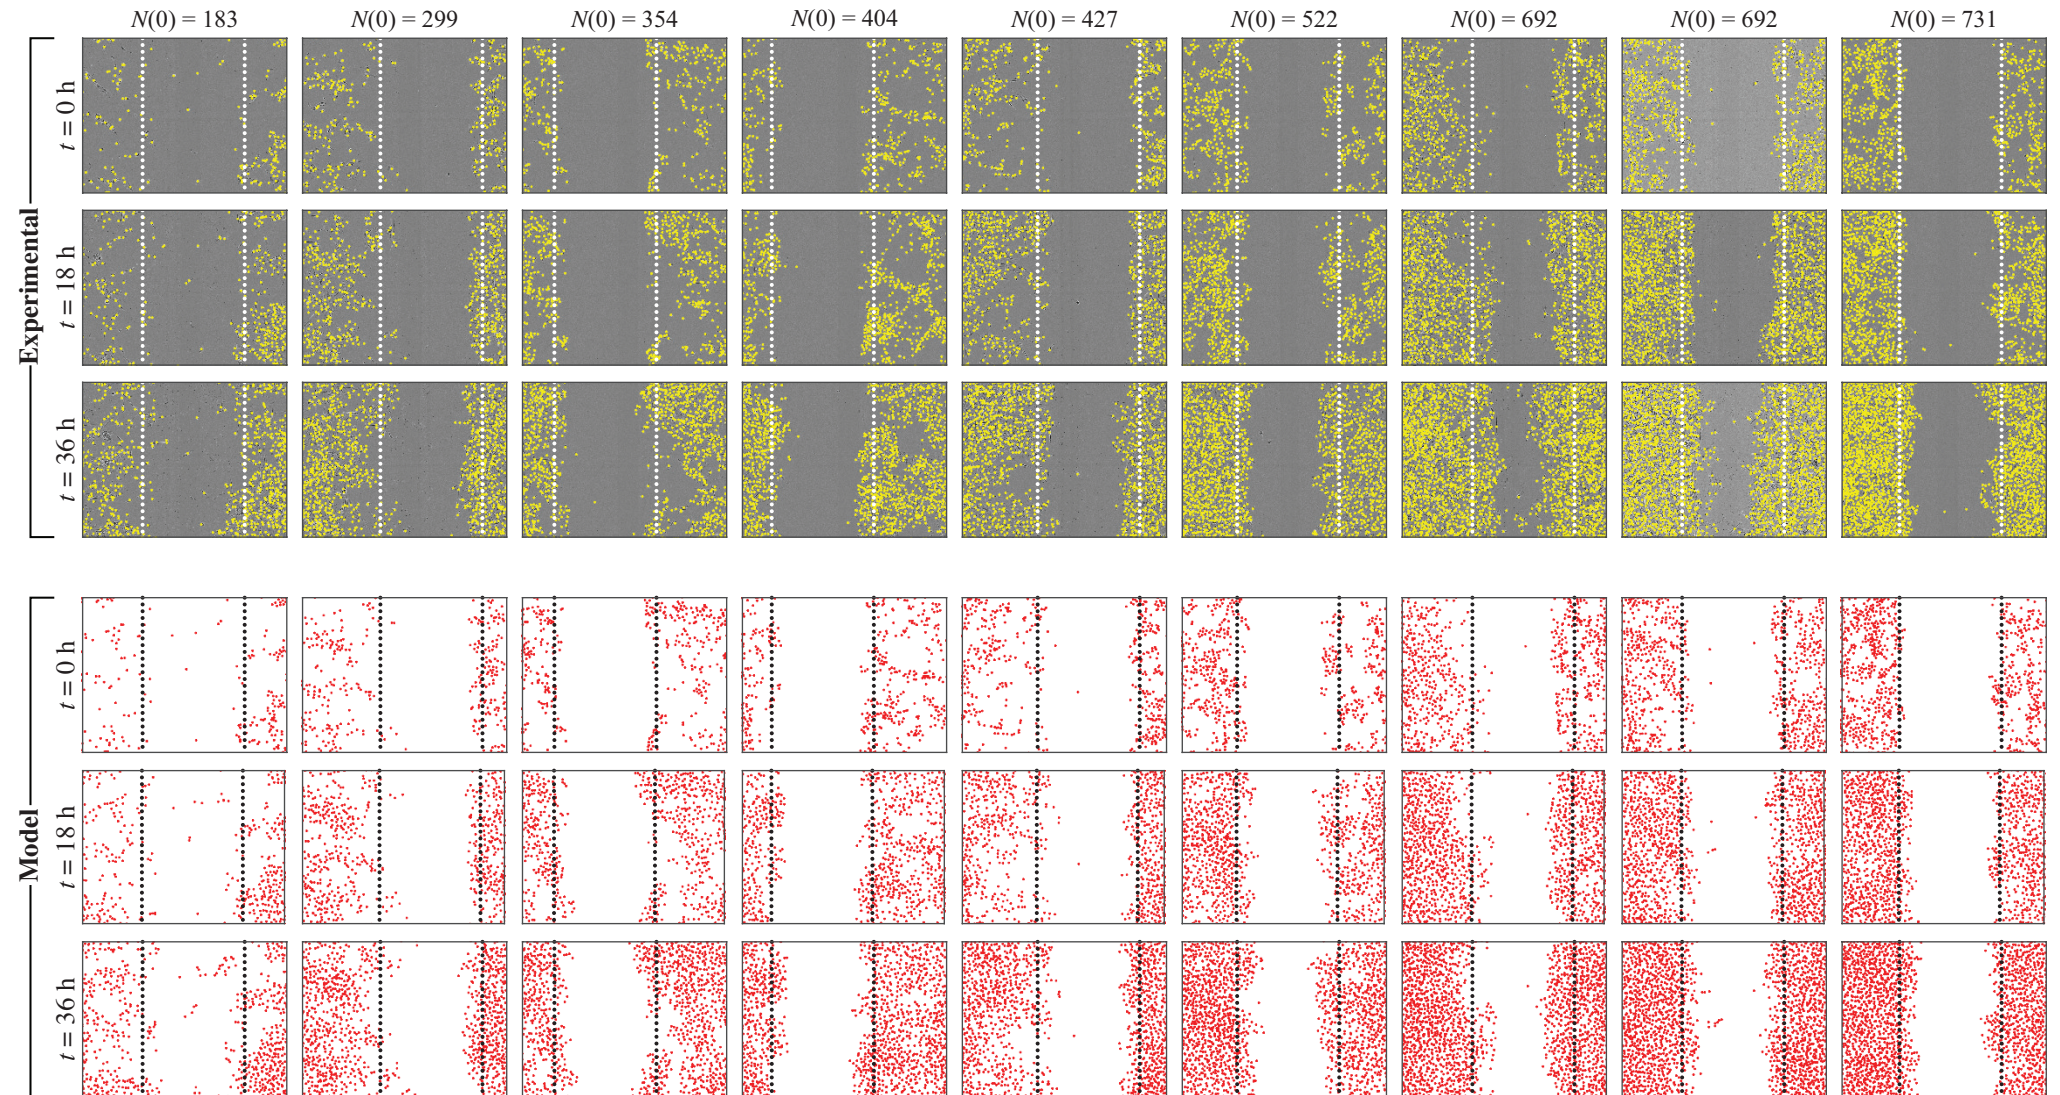

Figure S9: Reproduction of results in figure 6a-l of the main document, for all replicates, for  $\sigma = 24 \mu\text{m}$ .

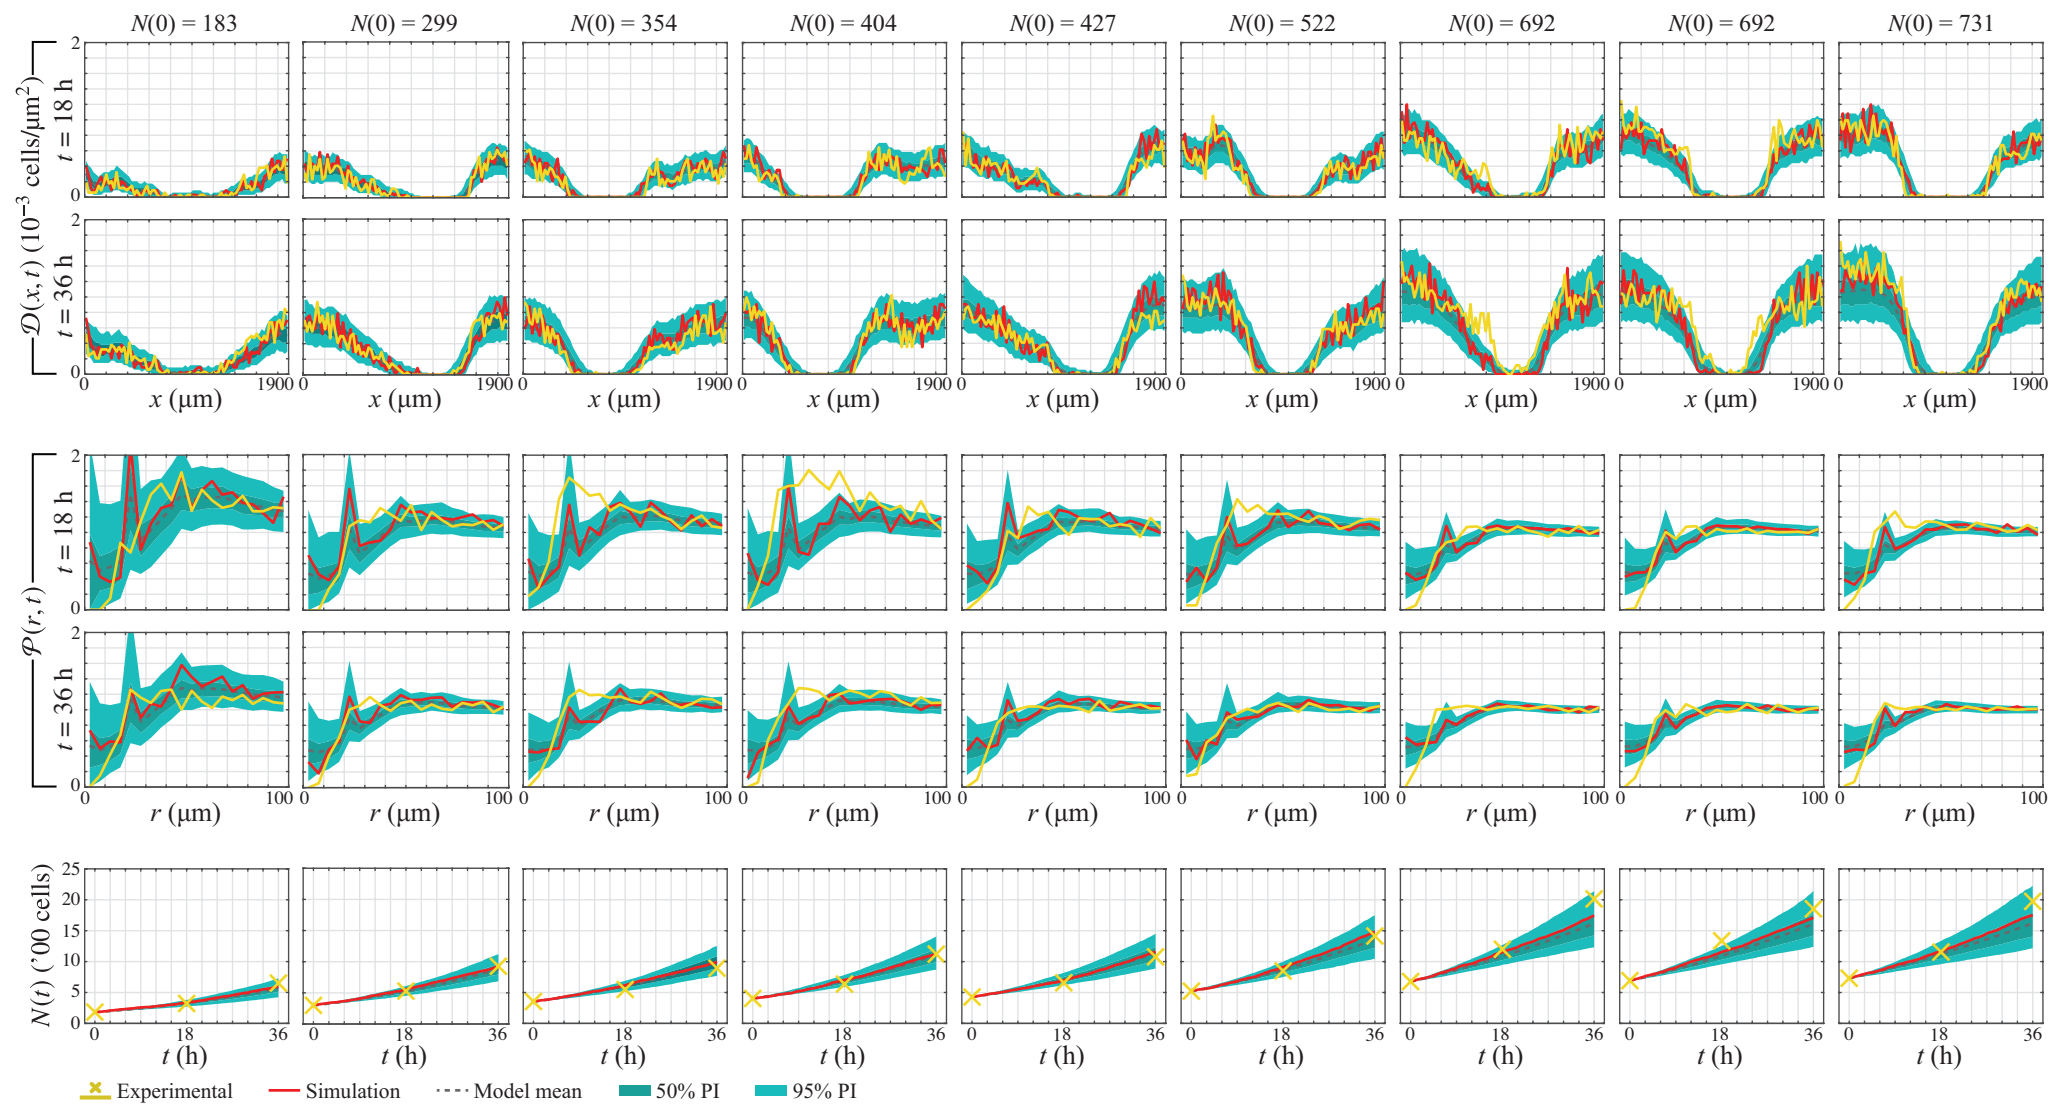

Figure S10: Reproduction of results in figure 6m-x of the main document, for all replicates, for  $\sigma = 24 \mu\text{m}$ .

## References

- [1] Toni T, Welch D, Strelkowa N, Ipsen A, Stumpf MPH. 2009 Approximate Bayesian computation scheme for parameter inference and model selection in dynamical systems. *J R Soc Interface* **6**, 187–202.
- [2] Filippi S, Barnes CP, Cornebise J, Stumpf MPH. 2013 On optimality of kernels for approximate Bayesian computation using sequential Monte Carlo. *Stat Appl Genet Mol Biol* **12**, 87–107.
- [3] Skellam JG. 1951 Random dispersal in theoretical populations. *Biometrika* **38**, 196–218.
